# Supplementary material for: Thoracic Society of Australia and New Zealand (TSANZ) position statement on chronic suppurative lung disease and bronchiectasis in children, adolescents and adults in Australia and New Zealand
Source: PubMed Central journal article supplement — Respirology. 2023 Mar 2;28(4):339–49. doi: 10.1111/resp.14479 (PMC10947421; doi:10.1111/resp.14479), 2023-03-02

# CHRONIC SUPPURATIVE LUNG DISEASE AND BRONCHIECTASIS IN CHILDREN, ADOLESCENTS AND ADULTS IN AUSTRALIA AND NEW ZEALAND

## *Thoracic Society of Australia and New Zealand (TSANZ) Position Statement*

Bronchiectasis is an **important but** neglected chronic pulmonary disorder.

**Objectives** of our updated position statement are to:

1. Increase awareness of the disease burden;
2. Encourage earlier and improved diagnosis and best-practice management;
3. Present an updated multi-disciplinary position statement on management of bronchiectasis.

A series of statements was generated, informed by literature searches. These were supported by 47 other health experts as part of a Delphi process.

The **33 statements** addressed the following broad categories:

- Awareness and diagnosis including paediatric-specific criteria
- Baseline tests for aetiology and severity
- Management
  - Antibiotics
  - Airway clearance techniques
  - Pulmonary rehabilitation
- Monitoring
  - Microbiology, disease
  - Co-morbidities
- General wellbeing
- Health services, including those for under-served communities

The **TSANZ statements** seek to achieve the patient-oriented goals of:

- ❖ - Preserving lung function
- Halting disease progression
- ❖ - Optimising QoL
- ❖ - Reducing exacerbations
- ❖ - Preventing complications

And in children and adolescents also:

- ❖ - Optimising lung growth
- ❖ - Reversing mild bronchiectasis

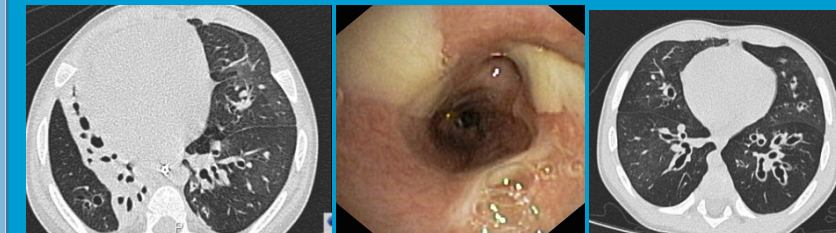

Supplement: RESP-28-339-s002.pdf [file RESP-28-339-s002.pdf]
